# Supplementary material for: Advanced spot quality analysis in two-colour microarray experiments
Source: PubMed Central journal article supplement (PMC2556690; doi:10.1186/1756-0500-1-80), 2008-09-17

A

MAIA

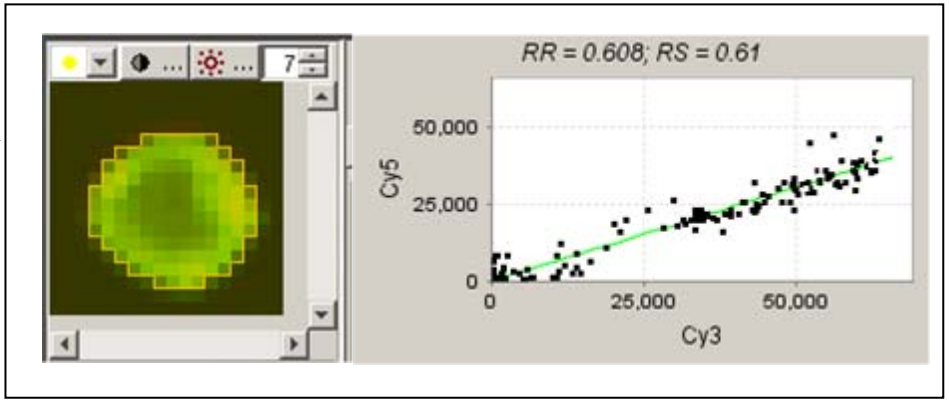

GP

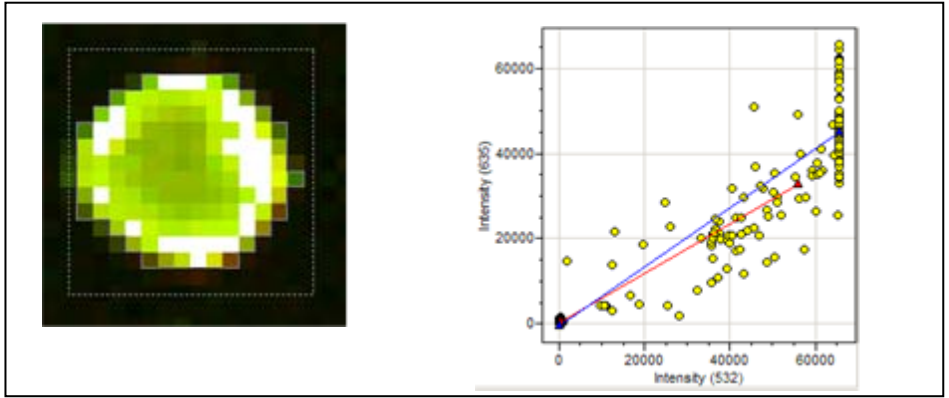

B

MAIA

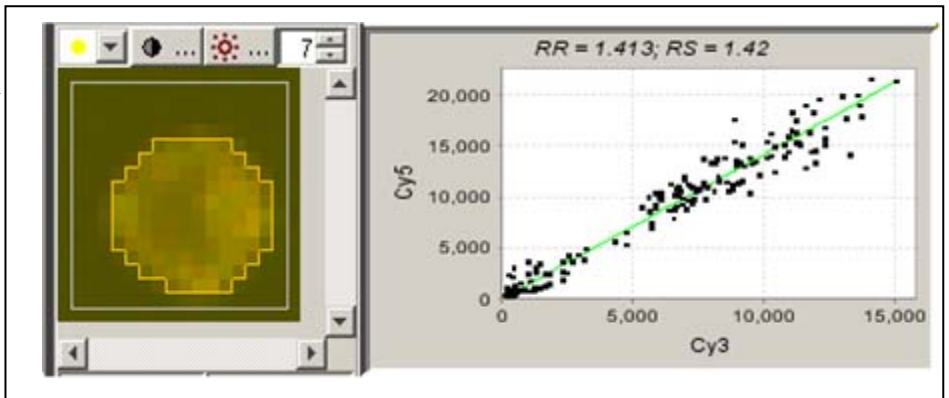

GP

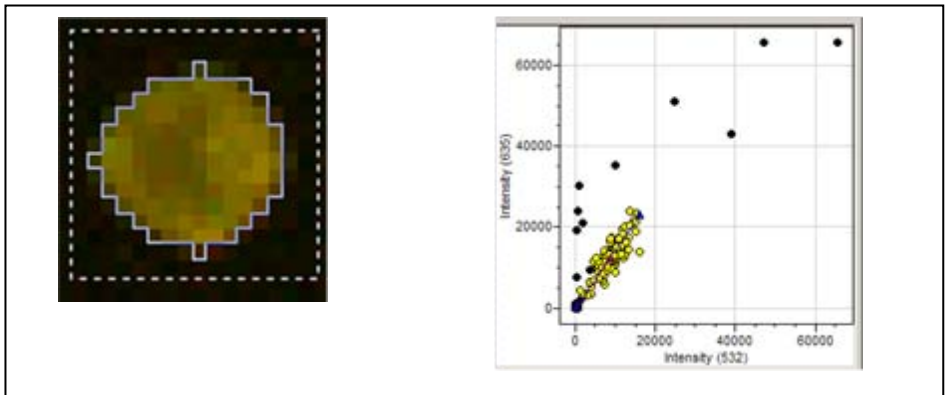

Supplement: 1756-0500-1-80-S4.pdf [file 1756-0500-1-80-S4.pdf]
